# Supplementary material
Source: Springer Nature journal article supplement (https://www.springermedizin.de/resource/supplementary/12911_2012_600_MOESM5_ESM.pdf/9525934)

```

Script
Data1 = Filter Data by Exists($1) (#1)
RELATION_A = group Data1 by $0; (#2)
RELATION_B = foreach RELATION_A generate group,
  InnerGroup(DATA, DATA.$1); (#3)
OUTPUT = foreach RELATION_B generate group, $1.$0,
  COUNT($1.$1), $1.$2, COUNT($1.$3), $1.$4, COUNT($1.$5);

```

```

GroupFileFormat
Medicine_a(aaaa,aaab), Medicine_b(bbbb), Medicine_c(ccca,cccb)

```

```

OUTPUT
(0000, medicine_a, 2, medicine_b, 2, medicine_c, 3)
(1111, medicine_a, 2, medicine_b, 0, medicine_c, 0)
(2222, medicine_a, 0, medicine_b, 1, medicine_c, 0)

```

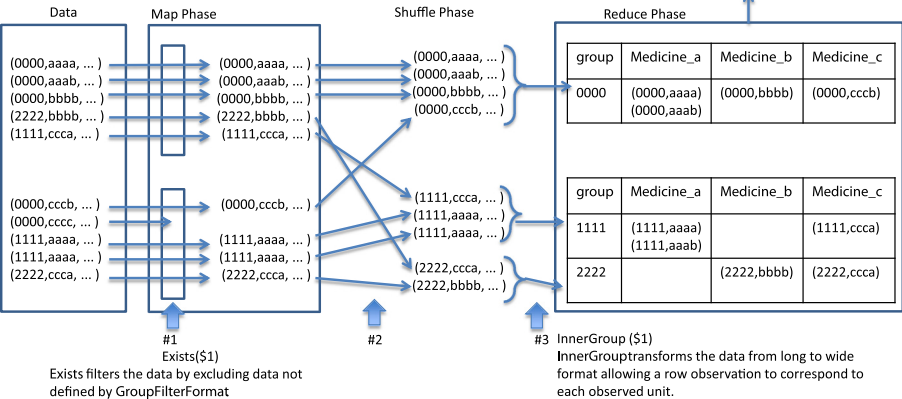

Supplement: MOESM5 [file 9525934]
